# Supplementary material for: E-Selective semi-hydrogenation of alkynes via a sulfur-radical mediation over cyclodextrin-modified nickel nanocatalyst
Source: Royal Society of Chemistry journal article supplement (doi:10.1039/d2cy01984a), 2023-01-01
Supplement: d2cy01984a1.pdf [file d2cy01984a1.pdf]

# Catalysis Science & Technology

## ***E*-Selective Semi-hydrogenation of Alkynes via a Sulfur-radical Mediation over Cyclodextrin-modified Nickel Nanocatalyst**

*Yatao Su,<sup>a, ‡</sup> Xiu Wang,<sup>a, ‡</sup> Qianwen Lin,<sup>a</sup> Qi Shen,<sup>a</sup> Shuangwen Xu,<sup>a</sup> Liping Fang,<sup>a</sup> Xin Wen<sup>a,\*</sup>*

<sup>a</sup>Key Laboratory of Chemical Biology of Hebei Province, College of Chemistry and Materials  
Science, Hebei University, Baoding 071002, China.

‡ These authors contributed equally to this work.

\* Corresponding author: E-mail address: [wenxin767@hotmail.com](mailto:wenxin767@hotmail.com)

# Supplementary Materials

## Table of contents

|                                                                                                                             |     |
|-----------------------------------------------------------------------------------------------------------------------------|-----|
| <b>Synthesis of CH-SH</b> .....                                                                                             | S3  |
| <b>Fig. S1</b> Synthesis of heptakis-(6-mercapto-6-deoxy)- $\beta$ -cyclodextrin (CD-SH).....                               | S3  |
| <b>Table S1</b> Screening of ligands for the semi-hydrogenation of DPA.....                                                 | S5  |
| <b>Table S2</b> Screening of the amount of CD-SH for the semi-hydrogenation of DPA.....                                     | S5  |
| <b>Table S3</b> Screening of catalyst precursors for the semi-hydrogenation of DPA.....                                     | S6  |
| <b>Table S4</b> Screening of the amount of $\text{NiCl}_2 \cdot 6\text{H}_2\text{O}$ for the semi-hydrogenation of DPA..... | S6  |
| <b>Table S5</b> Screening of protic solvent for the semi-hydrogenation of DPA.....                                          | S7  |
| <b>Table S6</b> Screening of the amount of methanol for the semi-hydrogenation of DPA.....                                  | S7  |
| <b>Table S7</b> Screening of solvent for the semi-hydrogenation of DPA.....                                                 | S8  |
| <b>Table S8</b> Screening of the amount of $\text{Mg}(\text{OAc})_2$ for the semi-hydrogenation of DPA.....                 | S8  |
| <b>Table S9</b> Screening of the amount of $\text{NaBH}_4$ for the semi-hydrogenation of DPA.....                           | S9  |
| <b>Table S10</b> Comparison of TOF for the semihydrogenation of DPA with different reported catalysts.....                  | S10 |
| <b>Fig. S2</b> Reusability of CD-SH modified nickel nanocatalyst in the semi-hydrogenation of DPA.....                      | S13 |
| <b>Table S11</b> Effects of thiols on the <i>Z</i> -to- <i>E</i> isomerization of stilbene.....                             | S14 |
| <b>NMR spectra data of products</b> .....                                                                                   | S15 |

## Synthesis of CH-SH

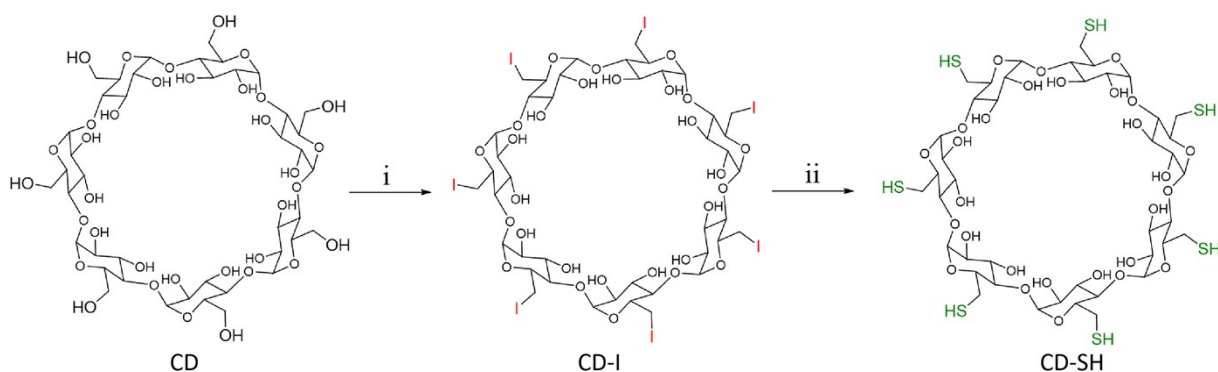

**Fig. S1** Synthesis of heptakis-(6-mercapto-6-deoxy)-β-cyclodextrin (CD-SH).

Heptakis-(6-mercapto-6-deoxy)-β-cyclodextrin (CD-SH) was synthesized in two steps (Fig. S1).

**(i) Synthesis of CD-I:** β-cyclodextrin (CD) was recrystallized three times in distilled water (12.0 g CD, 24 mL water) and vacuum dried at 120 °C for 24 h. Triphenylphosphine (40.1 g, 153 mmol) and I<sub>2</sub> (40.5 g, 160 mmol) were dissolved in dried DMF (120 mL and 40 mL), respectively. Subsequently, I<sub>2</sub> solution was added dropwise to the triphenylphosphine solution under stirring. CD (10.2 g) was added to the dark brown solution. The mixture was then heated to 70 °C under a nitrogen atmosphere and stirred for 18 hours. After completed, half of the volume of DMF in the reaction system was removed by vacuum distillation. A solution of sodium methoxide (17.0 mg, 90 mL) was slowly added to the concentrated reaction mixture with cooling in an ice bath, and the pH was adjusted to 9 by NaOH aqueous solution (1.0 M). After stirring for another hour, a large amount of yellow solids were produced, and the color of the solution was turned to brick red. When the reaction mixture was poured into a large amount of methanol (400 mL), more precipitate was formed. The yellow solids were separated by filtration, washed with methanol several times until the color of precipitate was white, and dried under vacuum to give white solids (CD-I).

**(ii) Synthesis of CD-SH:** In a 250-mL three-necked flask with a dropping funnel, CD-I (0.965 g) and thiourea (0.301 g) in DMF (10 mL) was placed under a nitrogen atmosphere. The reaction mixture was raised to 70 °C and stirred for 19 h. Most DMF was removed by vacuum distillation to obtain yellow oily substance. Water (50 mL) and sodium hydroxide (0.26 g) were added and then refluxed for 1 h under a nitrogen atmosphere. The reaction solution was cooled to room temperature and acidified with  $\text{KHSO}_4$  solution. The precipitate was separated by filtration, washed with distilled water several times, and dried under vacuum below 35 °C for several days to obtain white solid powder (CD-SH).

## Optimization of reaction conditions

**Table S1** Screening of ligands for the semi-hydrogenation of DPA to *E*-stilbene

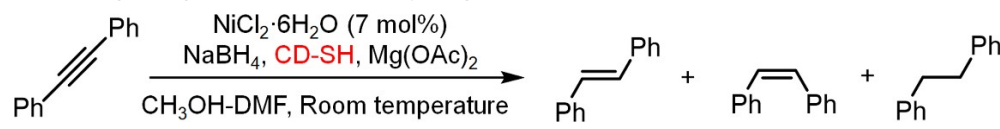

| Entry | Ligand <sup>a</sup> | Conv. (%) | <i>E/Z</i> /alkane (%) |
|-------|---------------------|-----------|------------------------|
| 1     | $\alpha$ -CD-SH     | >99       | 68/26/6                |
| 2     | CD-SH               | >99       | 82/7/11                |
| 3     | $\gamma$ -CD-SH     | >99       | 65/24/11               |
| 4     | 1-octanethiol       | >99       | 53/47/0                |
| 5     | 1-dodecanethiol     | >99       | 50/48/2                |
| 6     | 1-octadecanethiol   | >99       | 53/43/4                |

Reaction conditions: DPA (1 mmol), NiCl<sub>2</sub>·6H<sub>2</sub>O (7 mol%), NaBH<sub>4</sub> (4 equiv.), ligand (3 mol%), Mg(OAc)<sub>2</sub> (4 equiv.), CH<sub>3</sub>OH (0.35 mL), DMF (8 mL), room temperature, 1 h. <sup>a</sup>  $\alpha$ -CD-SH, CD-SH and  $\gamma$ -CD-SH refer to heptakis-(6-mercapto-6-deoxy)- $\alpha$ -cyclodextrin, heptakis-(6-mercapto-6-deoxy)- $\beta$ -cyclodextrin and heptakis-(6-mercapto-6-deoxy)- $\gamma$ -cyclodextrin, respectively.

**Table S2** Screening of the amount of CD-SH for the semi-hydrogenation of DPA to *E*-stilbene

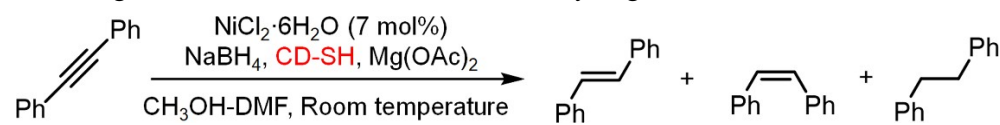

| Entry | CD-SH (mol%) | Conv. (%) | <i>E/Z</i> /alkane (%) |
|-------|--------------|-----------|------------------------|
| 1     | 0            | >99       | 36/54/10               |
| 2     | 1            | >99       | 66/25/9                |
| 3     | 2            | >99       | 78/9/13                |
| 4     | 3            | >99       | 82/7/11                |
| 5     | 4            | >99       | 78/8/14                |
| 6     | 5            | >99       | 77/7/16                |

Reaction conditions: DPA (1 mmol), NiCl<sub>2</sub>·6H<sub>2</sub>O (7 mol%), NaBH<sub>4</sub> (4 equiv.), CD-SH, Mg(OAc)<sub>2</sub> (4 equiv.), CH<sub>3</sub>OH (0.35 mL), DMF (8 mL), room temperature, 1 h.

**Table S3** Screening of catalyst precursors for the semi-hydrogenation of DPA to *E*-stilbene
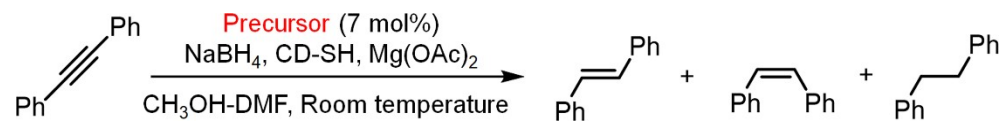

| Entry | Catalyst precursor                                             | Conv. (%) | <i>E/Z</i> /alkane (%) |
|-------|----------------------------------------------------------------|-----------|------------------------|
| 1     | NiCl <sub>2</sub>                                              | >99       | 82/7/11                |
| 2     | Ni(OAc) <sub>2</sub>                                           | >99       | 80/8/12                |
| 3     | Ni(C <sub>5</sub> H <sub>7</sub> O <sub>2</sub> ) <sub>2</sub> | >99       | 76/10/14               |
| 4     | NiI <sub>2</sub>                                               | >99       | 42/54/4                |
| 5     | Pd(OAc) <sub>2</sub>                                           | 39        | 0/99/1                 |
| 6     | Co(OAc) <sub>2</sub>                                           | >99       | 24/57/19               |

Reaction conditions: DPA (1 mmol), catalyst precursor (7 mol%), NaBH<sub>4</sub> (4 equiv.), CD-SH (3 mol%), Mg(OAc)<sub>2</sub> (4 equiv.), CH<sub>3</sub>OH (0.35 mL), DMF (8 mL), room temperature, 1 h.

**Table S4** Screening of the amount of NiCl<sub>2</sub>·6H<sub>2</sub>O for the semi-hydrogenation of DPA to *E*-stilbene
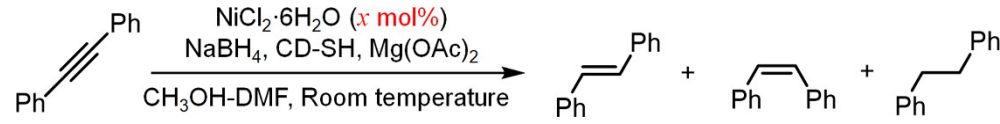

| Entry | Amount of NiCl <sub>2</sub> ·6H <sub>2</sub> O (mol%) | Conv. (%) | <i>E/Z</i> /alkane (%) |
|-------|-------------------------------------------------------|-----------|------------------------|
| 1     | 0                                                     | 0         | 0/0/0                  |
| 2     | 5                                                     | >99       | 69/16/15               |
| 3     | 6                                                     | >99       | 73/14/13               |
| 4     | 7                                                     | >99       | 82/7/11                |
| 5     | 8                                                     | >99       | 75/9/16                |

Reaction conditions: DPA (1 mmol), NiCl<sub>2</sub>·6H<sub>2</sub>O, NaBH<sub>4</sub> (4 equiv.), CD-SH (3 mol%), Mg(OAc)<sub>2</sub> (4 equiv.), CH<sub>3</sub>OH (0.35 mL), DMF (8 mL), room temperature, 1 h.

**Table S5** Screening of protic solvent for the semi-hydrogenation of DPA to *E*-stilbene
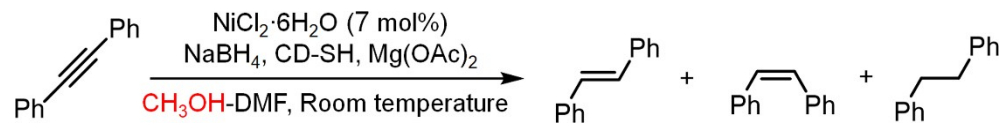

| Entry | Protic solvent                   | Conv. (%) | <i>E/Z</i> /alkane (%) |
|-------|----------------------------------|-----------|------------------------|
| 1     | CH <sub>3</sub> OH               | >99       | 82/7/11                |
| 2     | C <sub>2</sub> H <sub>5</sub> OH | >99       | 64/27/9                |
| 3     | H <sub>2</sub> O                 | >99       | 46/50/4                |

Reaction conditions: DPA (1 mmol), NiCl<sub>2</sub>·6H<sub>2</sub>O (7 mol%), NaBH<sub>4</sub> (4 equiv.), CD-SH (3 mol%), Mg(OAc)<sub>2</sub> (4 equiv.), protic solvent (0.35 mL), DMF (8 mL), room temperature, 1 h.

**Table S6** Screening of the amount of methanol for the semi-hydrogenation of DPA to *E*-stilbene
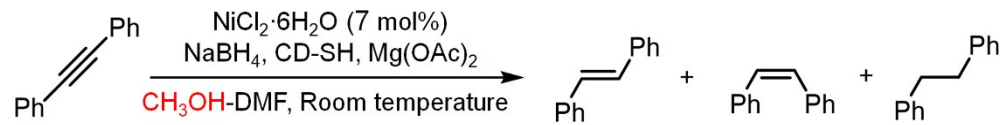

| Entry | CH <sub>3</sub> OH volume (mL) | Conv. (%) | <i>E/Z</i> /alkane (%) |
|-------|--------------------------------|-----------|------------------------|
| 1     | 0                              | 98        | 52/36/12               |
| 2     | 0.10                           | >99       | 63/29/8                |
| 3     | 0.20                           | >99       | 75/15/10               |
| 4     | 0.30                           | >99       | 79/8/13                |
| 5     | 0.35                           | >99       | 82/7/11                |
| 6     | 0.40                           | >99       | 81/5/14                |

Reaction conditions: DPA (1 mmol), NiCl<sub>2</sub>·6H<sub>2</sub>O (7 mol%), NaBH<sub>4</sub> (4 equiv.), CD-SH (3 mol%), Mg(OAc)<sub>2</sub> (4 equiv.), CH<sub>3</sub>OH, DMF (8 mL), room temperature, 1 h.

**Table S7** Screening of solvent for the semi-hydrogenation of DPA to *E*-stilbene
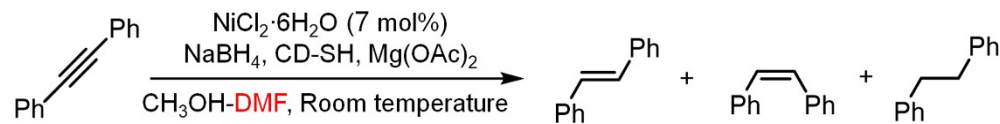

| Entry | Solvent                              | Conv. (%) | <i>E/Z</i> /alkane (%) |
|-------|--------------------------------------|-----------|------------------------|
| 1     | DMF                                  | >99       | 82/7/11                |
| 2     | <i>N,N</i> -dimethylacetamide (DMAc) | >99       | 73/7/20                |
| 3     | tetrahydrofuran THF                  | 84        | 48/50/2                |
| 4     | CH <sub>2</sub> Cl <sub>2</sub>      | 22        | 72/21/7                |
| 5     | 1,4-dioxane                          | 61        | 9/87/4                 |
| 6     | acetone                              | 10        | 32/64/4                |
| 7     | acetonitrile                         | >99       | 31/60/9                |

Reaction conditions: DPA (1 mmol), NiCl<sub>2</sub>·6H<sub>2</sub>O (7 mol%), NaBH<sub>4</sub> (4 equiv.), CD-SH (3 mol%), Mg(OAc)<sub>2</sub> (4 equiv.), CH<sub>3</sub>OH (0.35 mL), solvent (8 mL), room temperature, 1 h.

**Table S8** Screening of the amount of Mg(OAc)<sub>2</sub> for the semi-hydrogenation of DPA to *E*-stilbene
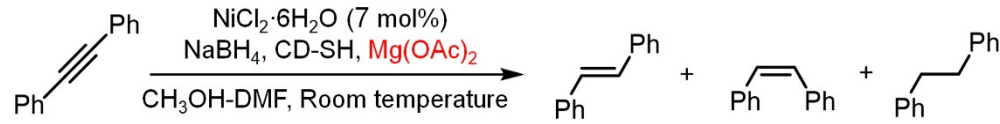

| Entry | Mg(OAc) <sub>2</sub> (equiv.) | Conv. (%) | <i>E/Z</i> /alkane (%) |
|-------|-------------------------------|-----------|------------------------|
| 1     | 0                             | >99       | 52/38/10               |
| 2     | 3                             | >99       | 74/16/10               |
| 3     | 4                             | >99       | 82/7/11                |
| 4     | 5                             | >99       | 72/15/13               |
| 5     | 6                             | >99       | 71/17/12               |

Reaction conditions: DPA (1 mmol), NiCl<sub>2</sub>·6H<sub>2</sub>O (7 mol%), NaBH<sub>4</sub> (4 equiv.), CD-SH (3 mol%), Mg(OAc)<sub>2</sub>, CH<sub>3</sub>OH (0.35 mL), DMF (8 mL), room temperature, 1 h.



**Table S9** Screening of the amount of NaBH<sub>4</sub> for the semi-hydrogenation of DPA to *E*-stilbene

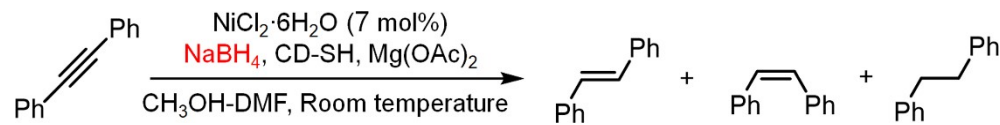

| Entry | NaBH <sub>4</sub> (equiv.)                 | Conv. (%) | <i>E/Z</i> /alkane (%) |
|-------|--------------------------------------------|-----------|------------------------|
| 1     | 0                                          | 0         | 0/0/0                  |
| 2     | 2                                          | >99       | 44/49/7                |
| 3     | 3                                          | >99       | 47/46/7                |
| 4     | 4                                          | >99       | 82/7/11                |
| 5     | 5                                          | >99       | 74/11/15               |
| 6     | NH <sub>3</sub> BH <sub>3</sub> (8 equiv.) | 53        | 28/68/4                |

Reaction conditions: DPA (1 mmol), NiCl<sub>2</sub>·6H<sub>2</sub>O (7 mol%), NaBH<sub>4</sub>, CD-SH (3 mol%), Mg(OAc)<sub>2</sub> (4 equiv.), CH<sub>3</sub>OH (0.35 mL), DMF (8 mL), room temperature, 1 h.

**Table S10** Comparison of TOF for the semihydrogenation of DPA to *E*-stilbene with different reported catalysts

| Catalyst                                                                                                                        | Hydrogen source            | Temp. (°C) | TOF <sup>a</sup> (h <sup>-1</sup> ) | Reference |
|---------------------------------------------------------------------------------------------------------------------------------|----------------------------|------------|-------------------------------------|-----------|
| 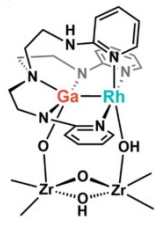                                               | H <sub>2</sub> (4.84 bar)  | 100        | 6.2                                 | S1        |
| <br>(py <sub>3</sub> tren)GaRhX<br>X = Me, OPh | H <sub>2</sub> (5 bar)     | 100        | 6.1                                 | S2        |
|                                                | H <sub>2</sub> (10 equiv.) | 45         | 2.2                                 | S3        |
|                                               | H <sub>2</sub> (1 atm)     | 150        | 0.19                                | S4        |
|                                              | NaH                        | 80         | 2.02                                | S5        |
|                                              | H <sub>2</sub> (10 bar)    | 25         | 0.71                                | S6        |
| <b>Cl<sub>2</sub>Pd(PPh<sub>3</sub>)<sub>2</sub></b>                                                                            | H <sub>2</sub> (1 atm)     | 25         | 0.8                                 | S7        |
|                                              | H <sub>2</sub> (4 atm)     | 30         | 4.64                                | S8        |

|                                                                                                        |                                 |                         |             |                  |
|--------------------------------------------------------------------------------------------------------|---------------------------------|-------------------------|-------------|------------------|
| 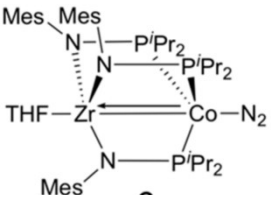                      | H <sub>2</sub> (1 atm)          | 60                      | 1.86        | S9               |
|                       | NH <sub>3</sub> BH <sub>3</sub> | 50                      | 2.28        | S10              |
| <b>NiI<sub>2</sub></b>                                                                                 | H <sub>2</sub> (15 bar)         | 100                     | 0.97        | S11              |
|                       | HCOOH                           | 120                     | 0.59        | S12              |
|                       | H <sub>3</sub> PO <sub>2</sub>  | 80                      | 8.1         | S13              |
|                      | NaBH <sub>4</sub>               | 80                      | 1.1         | S14              |
|                     | H <sub>2</sub> (1 atm)          | 25                      | 24.0        | S15              |
| <br>R = <i>i</i> Pr | H <sub>2</sub> (30 bar)         | 60                      | 6.2         | S16              |
|                     | H <sub>2</sub> (1 atm)          | 25                      | 9.9         | S17              |
| <b>NiCl<sub>2</sub>·6H<sub>2</sub>O + CD-SH</b>                                                        | <b>NaBH<sub>4</sub></b>         | <b>Room temperature</b> | <b>11.8</b> | <b>This work</b> |

<sup>a</sup>TOF = mol of yield *E*-stilbene/(mol of metal × time)

## References:

[S1] S. P. Desai, J. Ye, T. Islamoglu, O. K. Farha and C. C. Lu, *Organometallics*, 2019, **38**, 3466-3473.

- [S2] S. P. Desai, J. Ye, J. Zheng, M. S. Ferrandon, T. E. Webber, A. E. Platero-Prats, J. Duan, P. Garcia-Holley, D. M. Camaioni, K. W. Chapman, M. Delferro, O. K. Farha, J. L. Fulton, L. Gagliardi, J. A. Lercher, R. L. Penn, A. Stein and C. C. Lu, *J. Am. Chem. Soc.*, 2018, **140**, 15309-15318.
- [S3] K. T. Neumann, S. Klimczyk, M. N. Burhardt, B. Bang-Andersen, T. Skrydstrup and A. T. Lindhardt, *ACS Catal.*, 2016, **6**, 4710-4714.
- [S4] Y. Zhang, M. K. Karunananda, H. C. Yu, K. J. Clark, W. Williams, N. P. Mankad and D. H. Ess, *ACS Catal.*, 2019, **9**, 2657-2663.
- [S5] R. Kusy and K. Grela, *Org. Lett.*, 2016, **18**, 6196-6199.
- [S6] K. Radkowski, B. Sundararaju and A. Fürstner, *Angew. Chem.*, 2013, **125**, 373-378.
- [S7] R. Maazaoui, R. Abderrahim, F. Chemla, F. Ferreira, A. Perez-Luna and O. Jackowski, *Org. Lett.*, 2018, **20**, 7544-7549.
- [S8] K. Tokmic and A. R. Fout, *J. Am. Chem. Soc.*, 2016, **138**, 13700 -13705.
- [S9] K. M. Gramigna, D. A. Dickie, B. M. Foxman and C. M. Thomas, *ACS Catal.*, 2019, **9**, 3153-3164.
- [S10] S. Fu, N.Y. Chen, X. Liu, Z. Shao, S. P. Luo and Q. Liu, *J. Am. Chem. Soc.*, 2016, **138**, 8588 -8594.
- [S11] N. O. Thiel, B. Kaewmee, T. T. Ngoc and J. F. eichert, *Chem.-Eur. J.*, 2020, **26**, 1597-1603.
- [S12] E. Richmond and J. Moran, *J. Org. Chem.*, 2015, **80**, 6922 -6929.
- [S13] T. Chen, J. Xiao, Y. Zhou, S. Yin and L.-B. Han, *J. Organomet. Chem.*, 2014, **794**, 51-54.
- [S14] R. Barrios-Francisco and J. J. García, *Appl. Catal. A: Gen.*, 2010, **385**, 108-113.
- [S15] D. J. Hale, M. J. Ferguson and L. Turculet, *ACS Catal.*, 2022, **12**, 146–155.
- [S16] R. A. Farrar-Tobar, S. Weber, Z. Csendes, A. Ammaturo, S. Fleissner, H. Hoffmann, L. F. Veiros and K. Kirchner, *ACS Catal.*, 2022, **12**, 2253–2260.
- [S17] J. Shen, R. Usui and Y. Sunada, *Eur. J. Org. Chem.*, 2022, **2022**, e202101563.

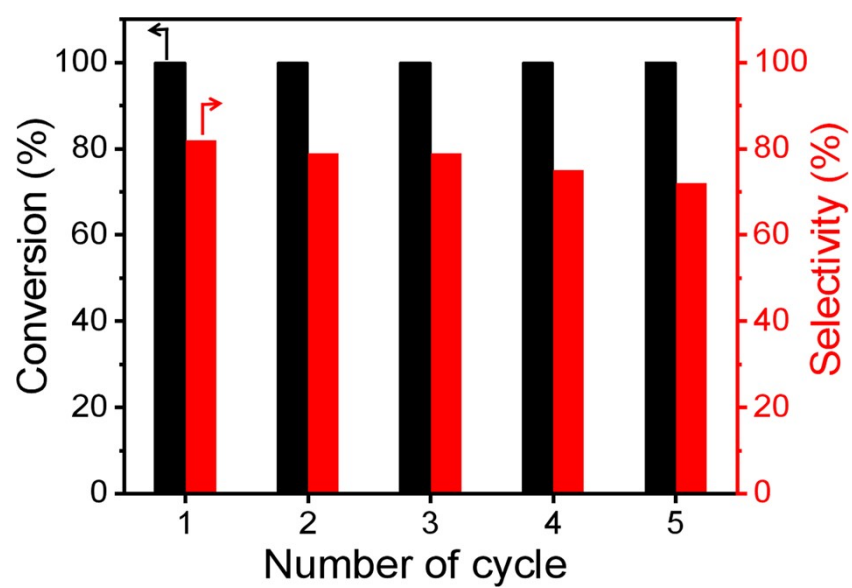

**Fig. S2** Reusability of CD-SH modified nickel nanocatalyst in the semi-hydrogenation of DPA to *E*-stilbene with sodium borohydride.

**Table S11** Effect of thiols on the *Z*-to-*E* isomerization of stilbene.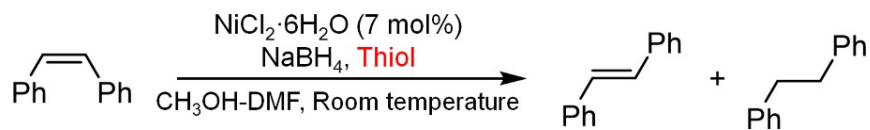

| Entry | Catalyst precursor                   | Solvent                | Additives                                           | Conv. (%) | <i>E</i> /alkane (%) |
|-------|--------------------------------------|------------------------|-----------------------------------------------------|-----------|----------------------|
| 1     | NiCl <sub>2</sub> ·6H <sub>2</sub> O | CH <sub>3</sub> OH/DMF | -                                                   | 8         | 63/35                |
| 2     | NiCl <sub>2</sub> ·6H <sub>2</sub> O | CH <sub>3</sub> OH/DMF |                                                     | 8         | 80/20                |
| 3     | NiCl <sub>2</sub> ·6H <sub>2</sub> O | CH <sub>3</sub> OH/DMF |                                                     | 31        | 24/76                |
| 4     | NiCl <sub>2</sub> ·6H <sub>2</sub> O | CH <sub>3</sub> OH/DMF |                                                     | 0         | 0                    |
| 5     | NiCl <sub>2</sub> ·6H <sub>2</sub> O | CH <sub>3</sub> OH/DMF |                                                     | 10        | 23/77                |
| 6     | NiCl <sub>2</sub> ·6H <sub>2</sub> O | CH <sub>3</sub> OH/DMF | CH <sub>3</sub> (CH <sub>2</sub> ) <sub>17</sub> SH | 43        | 100/0                |
| 7     | NiCl <sub>2</sub> ·6H <sub>2</sub> O | CH <sub>3</sub> OH/DMF |                                                     | 45        | 90/10                |
| 8     | NiCl <sub>2</sub> ·6H <sub>2</sub> O | CH <sub>3</sub> OH/DMF | CD-SH                                               | 93        | 94/6                 |

Reaction conditions: *Z*-stilbene (1 mmol), NiCl<sub>2</sub>·6H<sub>2</sub>O (7 mol%), thiol (3 mol%), CH<sub>3</sub>OH (0.35 mL), DMF (8 mL), NaBH<sub>4</sub> (4 equiv.), room temperature, 1 h.

## NMR spectra data of products

### $^1\text{H}$ NMR of monodeuterated *trans*-stilbene using $\text{NaBH}_4$ and $\text{CH}_3\text{OD}$ in $\text{CDCl}_3$

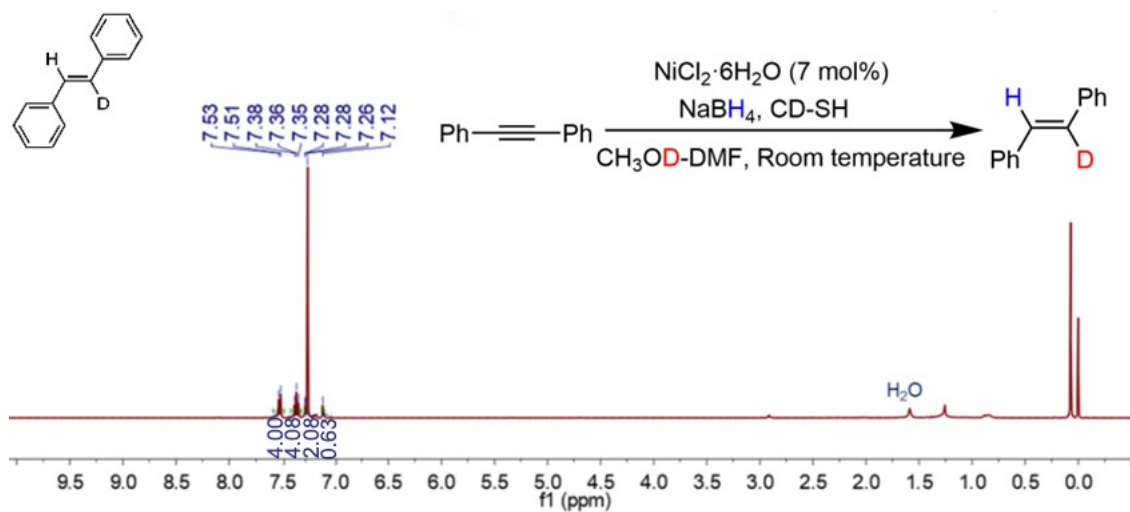

$^1\text{H}$  NMR (400 MHz,  $\text{CDCl}_3$ )  $\delta$  7.53 (d,  $J = 7.6$  Hz, 4H), 7.37 (t,  $J = 7.5$  Hz, 4H), 7.28 (s, 2H), 7.12 (s, 1H).

### $^1\text{H}$ NMR of monodeuterated *trans*-stilbene using $\text{NaBD}_4$ and $\text{CH}_3\text{OH}$ in $\text{CDCl}_3$

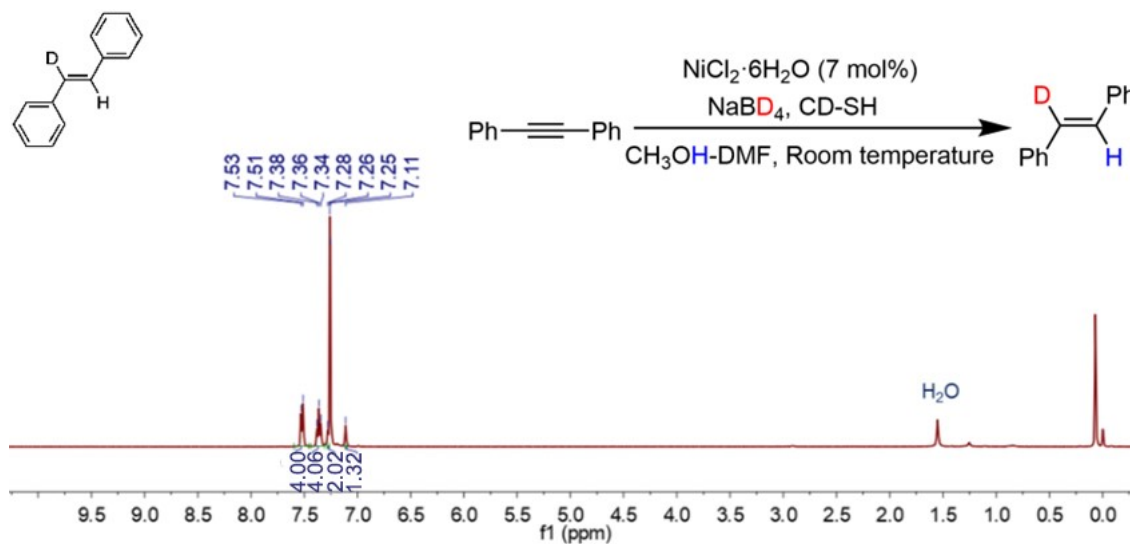

$^1\text{H}$  NMR (400 MHz,  $\text{CDCl}_3$ )  $\delta$  7.53 (d,  $J = 7.4$  Hz, 4H), 7.37 (t,  $J = 6.9$  Hz, 4H), 7.28 (s, 2H), 7.12 (s, 1H).

**<sup>1</sup>H NMR of dideuterated *trans*-stilbene using NaBD<sub>4</sub> and CH<sub>3</sub>OD in CDCl<sub>3</sub>**

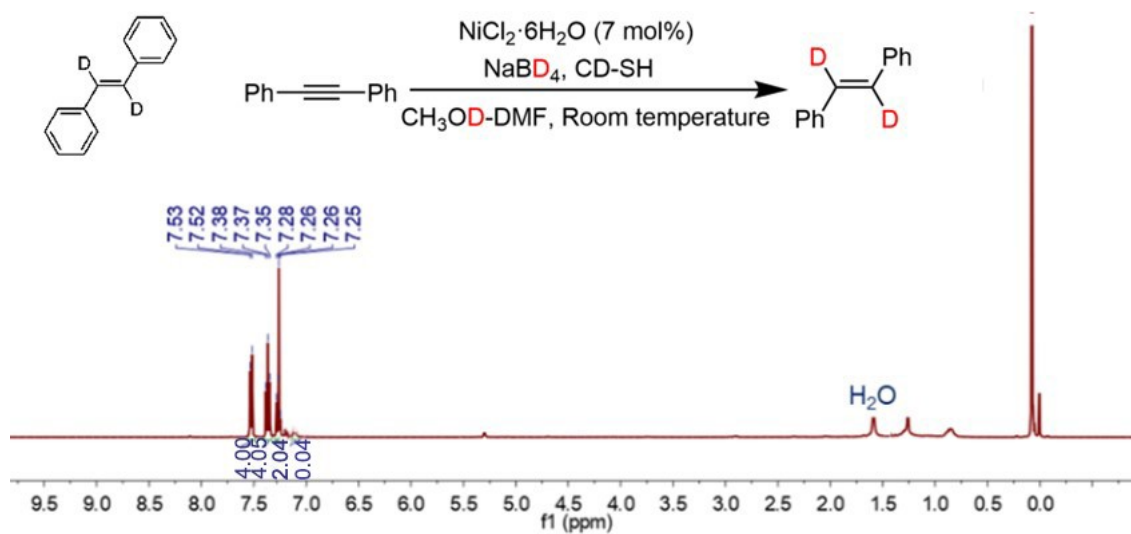

<sup>1</sup>H NMR (400 MHz, CDCl<sub>3</sub>) δ 7.53 (d, *J* = 7.7 Hz, 4H), 7.36 (s, 4H), 7.29 (s, 2H).

**<sup>1</sup>H NMR of *trans*-stilbene using NaBH<sub>4</sub> and CH<sub>3</sub>OD in CDCl<sub>3</sub>**

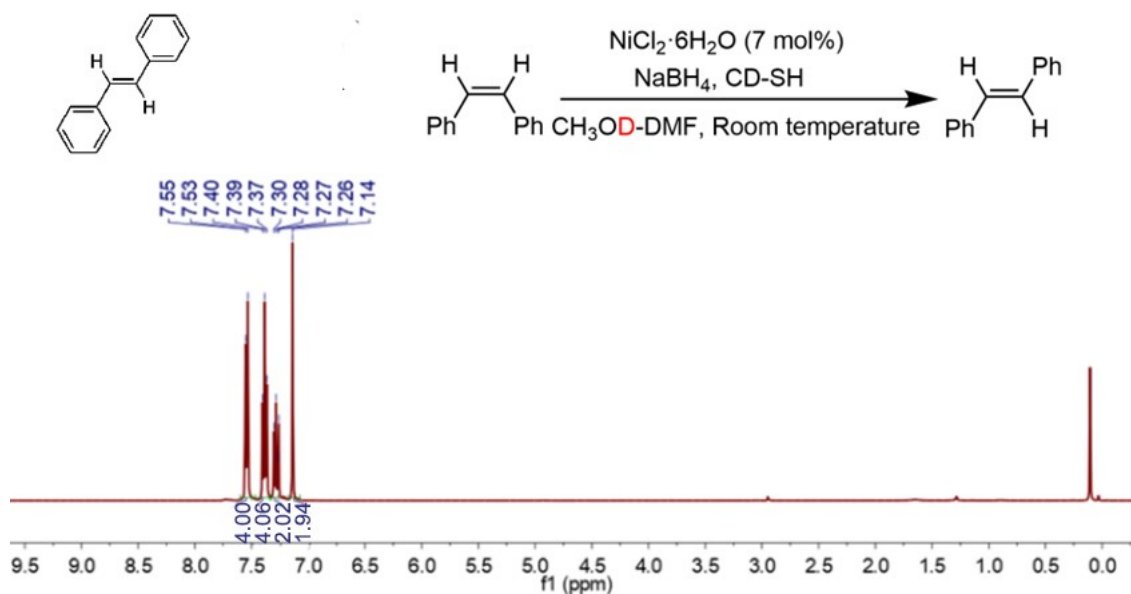

<sup>1</sup>H NMR (400 MHz, CDCl<sub>3</sub>) δ 7.55 (d, *J* = 7.5 Hz, 4H), 7.39 (t, *J* = 7.6 Hz, 4H), 7.28 (t, *J* = 7.4 Hz, 2H), 7.14 (s, 2H).



**<sup>1</sup>H NMR of *trans*-stilbene using NaBD<sub>4</sub> and CH<sub>3</sub>OH in CDCl<sub>3</sub>**

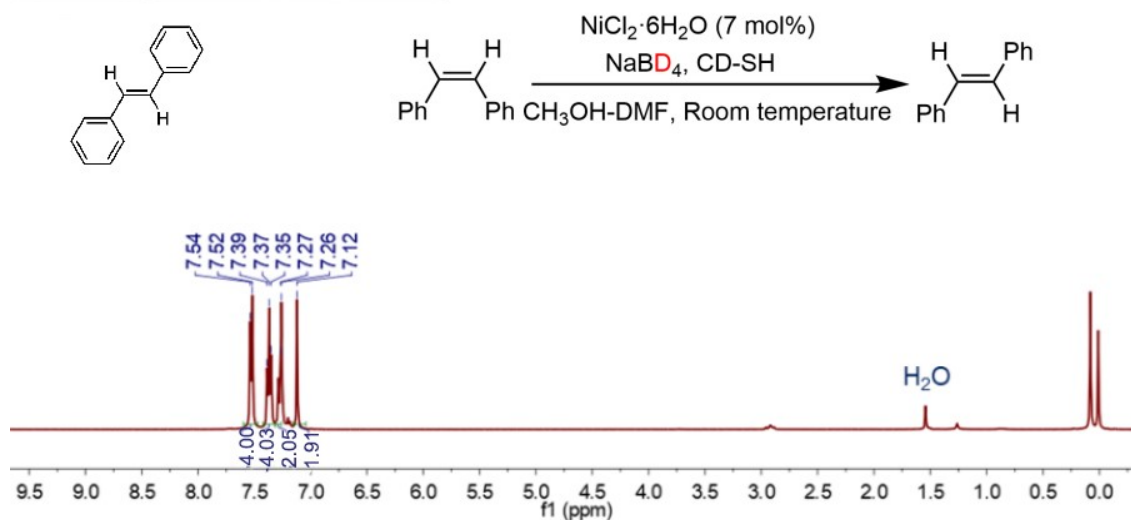

<sup>1</sup>H NMR (400 MHz, CDCl<sub>3</sub>) δ 7.54 (d, *J* = 7.7 Hz, 4H), 7.37 (t, *J* = 7.5 Hz, 4H), 7.28 (d, *J* = 8.6 Hz, 2H), 7.12 (s, 2H).

**<sup>1</sup>H NMR of *trans*-stilbene using NaBD<sub>4</sub> and CH<sub>3</sub>OD in CDCl<sub>3</sub>**

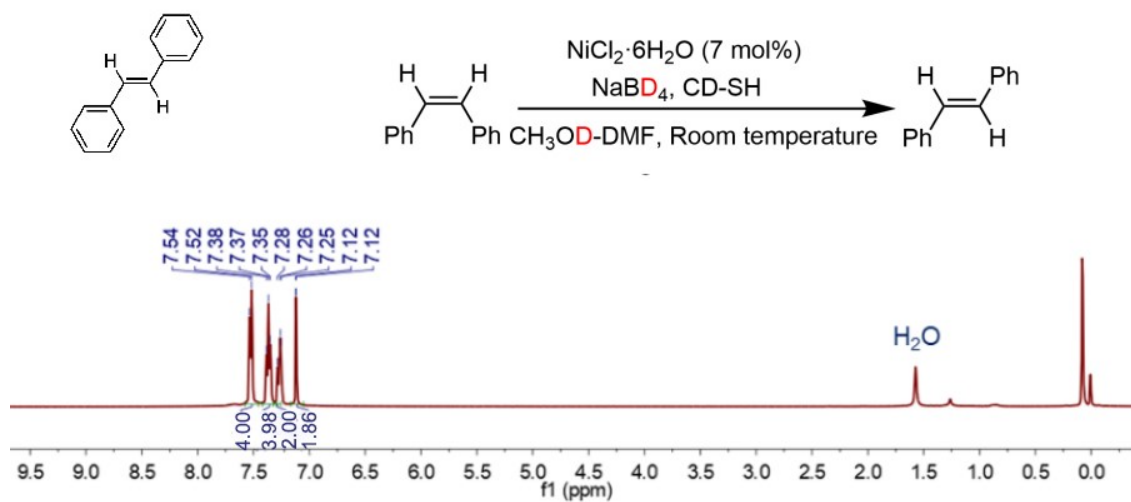

<sup>1</sup>H NMR (400 MHz, CDCl<sub>3</sub>) δ 7.54 (d, *J* = 7.4 Hz, 4H), 7.38 (t, *J* = 7.0 Hz, 4H), 7.28 (dd, *J* = 6.3, 4.8 Hz, 2H), 7.13 (d, *J* = 1.4 Hz, 2H).
